# Supplementary material for: Increased mental stress among undergraduate medical students in south-western Saudi Arabia during the COVID-19 pandemic
Source: PeerJ journal article supplement (doi:10.7717/peerj.13900), 2022-08-15
Supplement: peerj-69587-Pre-COVID_19_Questionnaire_Stress-Staff_File_AS.pdf [file peerj-69587-Pre-COVID_19_Questionnaire_Stress-Staff_File_AS.pdf]

## استبيان عن الشعور بالارهاق بين طالبات الكليات الصحية بجامعة الملك خالد

عزيزتي الطالبة:

هذا الاستبيان بغرض التعرف على مدى انتشار مرض الارتجاع المعدي و اثاره الصحية بين طالبات الكليات الصحية. و الغرض منه بالاضافة الى تدريب طلاب طب المجتمع في البحوث الصحية هو غرض بحثي بحت. برجااء التكرم بالاجابة بوضوح وموضوعية و عدم كتابة ما يدل على شخصيتك او اسمك في هذا الاستبيان. شاكرين مقدرين.  
طالبات المستوى الثامن كلية الطب بمقرر طب المجتمع.

1. البيانات الشخصية:

- A-** عمر: (      سنة )      **B-** الجنس: ذكر  انثى  **2**
- C-** الكلية:  الطب **1**       العلوم الطبية التطبيقية **2**       طب الاسنان **3**
- الصيدلة **4**       التمريض **5**
- D-** المستوى:  الثالث **3**       الرابع **4**       الخامس **5**       السادس **6**       السابع **7**
- الثامن **8**       التاسع **9**       العاشر **10**       الحادي عشر **11**       الثاني عشر **12**
- E-** المعدل التراكمي في السنة السابقة (      )
- F-** الحالة الاجتماعية:  متزوج **1**       أعزب **2**
- G-** دخل الأسرة:  كافي و يفيض **1**       كافي بالكاد **2**       لا يكفي **3**
- H-** التدخين:  مدخن **1**       مدخن سابق **2**       غير المدخن **3**

الأسئلة في هذا الاستبيان تتعلق بأحاسيسك وأفكارك خلال الشهر الماضي. ويطلب منك في كل سؤال أن تبين كم مرة أحسست أو فكرت بطريقة معينة. وإن كانت بعض الأسئلة متشابهة، غير أن هناك اختلافات بينها، لذلك المرجو منك أن تتعامل مع كل سؤال على أساس أنه سؤال مستقل. والطريقة المثلى هي أن تجيب على كل سؤال بسرعة، أي أن لا تحاول أن تحسب بالضبط عدد المرات التي أحسست بشيء معين، بل أن تجيب على السؤال بتقدير معقول. للإجابة على كل سؤال من الأسئلة التالية، اختر اجابة واحدة

| السؤال | لم يحدث أبدا<br>0 | تقريبا لم يحدث أبدا<br>1 | أحيانا<br>2 | في كثير من الأحيان ولكن الى حد ما<br>3 | كثيرا جدا<br>4 |
|--------|-------------------|--------------------------|-------------|----------------------------------------|----------------|
| O      |                   |                          |             |                                        |                |
| P      |                   |                          |             |                                        |                |
| Q      |                   |                          |             |                                        |                |
| R      |                   |                          |             |                                        |                |
| S      |                   |                          |             |                                        |                |
| T      |                   |                          |             |                                        |                |
| U      |                   |                          |             |                                        |                |
| V      |                   |                          |             |                                        |                |
| W      |                   |                          |             |                                        |                |
| X      |                   |                          |             |                                        |                |
